# Supplementary material for: Biosensors for the Detection of Interaction between Legionella pneumophila Collagen-Like Protein and Glycosaminoglycans
Source: PubMed Central journal article supplement (PMC6111780; doi:10.3390/s18082668), 2018-08-14
Supplement: sensors-18-02668-s001.pdf [file sensors-18-02668-s001.pdf]

# Biosensors for the detection of interaction between *Legionella pneumophila* collagen-like protein and glycosaminoglycans

Han Su <sup>a</sup>, Shaopei Li <sup>a</sup>, Mauricio Terebiznik <sup>b</sup>, Cyril Guyard <sup>c</sup> and Kagan Kerman <sup>a,\*</sup>

<sup>a</sup> Department of Physical and Environmental Sciences, University of Toronto Scarborough, 1265 Military Trail, Toronto, M1C 1A4, ON, Canada.

<sup>b</sup> Department of Biological Sciences and Cell and Systems Biology, University of Toronto Scarborough, 1265 Military Trail, Toronto, M1C 1A4, ON, Canada. terebiznik@utsc.utoronto.ca

<sup>c</sup> BIOASTER Microbiology Technology Institute, 40 Avenue Tony Garnier, 69007 Lyon, France. cyril.guyard@bioaster.org

\* Corresponding author: kagan.kerman@utoronto.ca; Tel.: +1 416 287 7249

## Supplementary Materials:

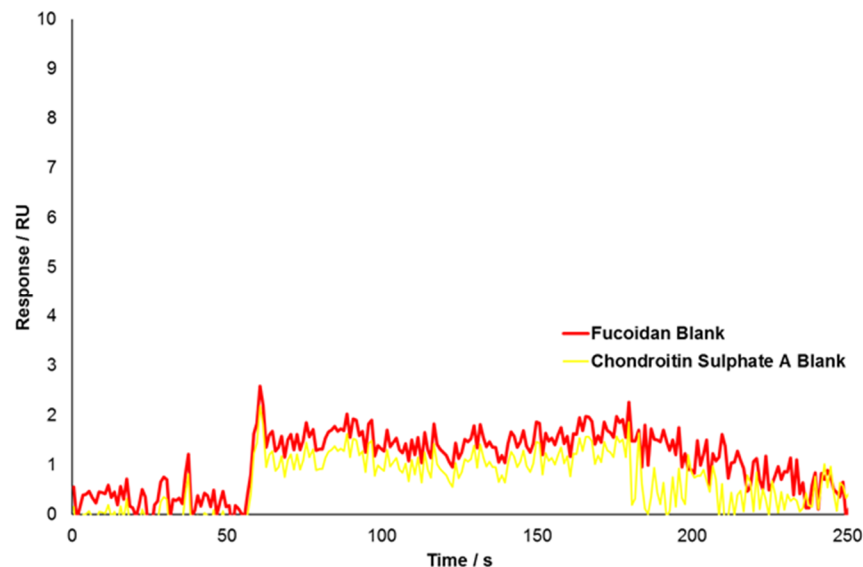

Figure S1: SPR responses of fucoidan and chondroitin Sulphate A on non-immobilized, Ni<sup>2+</sup> activated NTA sensorchip. This data demonstrate that the non-specific interaction of the analytes with the Ni<sup>2+</sup> activated NTA immobilized surface is negligible in the absence of His-rLcl.

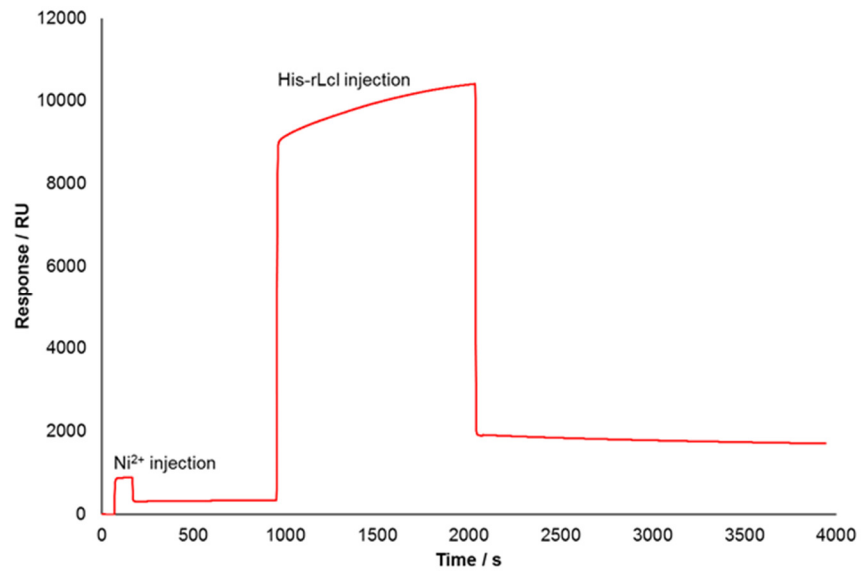

Figure S2: SPR responses of Ni<sup>2+</sup> activation, followed by immobilization of His-rLcl. HEPES buffer solution was injected after each injection to remove non-specifically adsorbed biomolecules.
